# Supplementary material for: Identifying active sites of CoNC/CNT from pyrolysis of molecularly defined complexes for oxidative esterification and hydrogenation reactions
Source: Royal Society of Chemistry journal article supplement (doi:10.1039/c5cy01349f), 2015-11-02
Supplement: c5cy01349f1.pdf [file c5cy01349f1.pdf]

**Supporting information**

**Identifying active sites of CoNC/CNT from pyrolysis of  
molecularly defined complexes for oxidative esterification  
and hydrogenation reactions**

Tianyuan Cheng<sup>a</sup>, Hao Yu<sup>\*a</sup>, Feng Peng<sup>a</sup>, Hongjuan Wang<sup>a</sup>, Bingsen Zhang<sup>\*b</sup>,

Dangsheng Su<sup>b</sup>

<sup>a</sup> *School of Chemistry and Chemical Engineering, South China University of  
Technology, Guangzhou 510640, P.R. China*

<sup>b</sup> *Catalysis and Materials Division, Shenyang National Laboratory for Materials  
Science, Institute of Metal Research, Chinese Academy of Sciences, Shenyang 110016,  
P.R. China*

**EELS analysis:** The Co-L<sub>2,3</sub> intensity ratio was determined by the method described by Pearson et al. <sup>1</sup>A 50eV width window was selected beginning at 50 eV past the onset of the L<sub>3</sub> white line. The linear fit curve of the loss intensity in this energy interval was extrapolated toward smaller energy losses. This line was then modified into a double step with the same slope with onsets occurring at the white-line maxima. The ratio of the step heights was chosen as 2:1 in accordance with the multiplicity of the initial states (four 2p<sub>3/2</sub> electrons and two 2p<sub>1/2</sub> electrons).

---

\* To whom correspondence should be addressed.

[yuhao@scut.edu.cn](mailto:yuhao@scut.edu.cn) (H Yu), Tel.: +86 20 87114916, Fax.: + 86 20 87114916;  
[bszhang@imr.ac.cn](mailto:bszhang@imr.ac.cn) (BS Zhang), Tel.: +86 24 83970027

**Table S1.** Catalytic performances of FeNC/CNT and CoNC/CNT catalysts in the oxidative esterification of BA (Scheme 1)<sup>a</sup>

| Entry | Catalysts | Composition  | $S_{\text{BET}}$          | Conv. | Selectivity (%) |      |
|-------|-----------|--------------|---------------------------|-------|-----------------|------|
|       |           |              |                           |       | BDH             | MB   |
|       |           | Co/Fe/N (w%) | ( $\text{m}^2/\text{g}$ ) | (%)   |                 |      |
| 1     | FeNC/CNT  | -/1.54/0.33  | 131.4                     | 24.5  | 82.9            | 17.1 |
| 2     | CoNC/CNT  | 1.81-/1.42   | 155.9                     | 88.1  | 8.4             | 91.6 |

<sup>a</sup> Reaction conditions: 0.4 ml BA, 32 ml  $\text{CH}_3\text{OH}$ , 0.1 g  $\text{K}_2\text{CO}_3$ , 0.2 g catalyst, 60 °C, 2 MPa  $\text{O}_2$ , 12 h

For comparison, FeNC/CNT catalyst was synthesized using 90 mg of  $\text{Fe}(\text{OAc})_2$ , 205 mg of 1,10-phenanthroline (Fe : phenanthroline = 1:2 (mol)) and 650 mg of CNTs with the same procedure. As shown in Table S1, the conversion of CoNC/CNT is about 3.5 folds higher than FeNC/CNT.

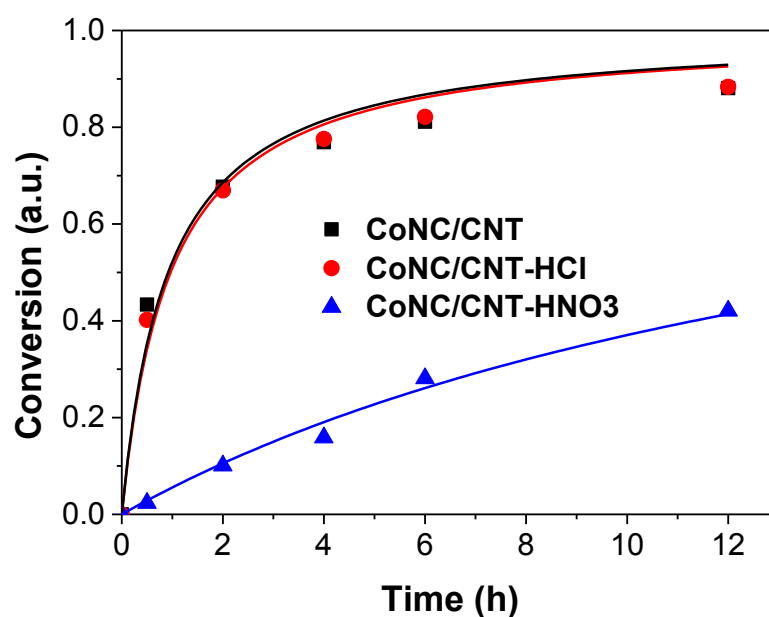

**Fig. S1** Time courses of CoNC/CNT, CoNC/CNT-HCl, CoNC/CNT-HNO<sub>3</sub> in the oxidative esterification of BA. The curves are fitted by the pseudo-second-order kinetics. Reaction conditions: 0.4 ml BA, 32 ml  $\text{CH}_3\text{OH}$ , 0.1 g  $\text{K}_2\text{CO}_3$ , 0.2 g catalyst, 60 °C, 2 MPa  $\text{O}_2$ .

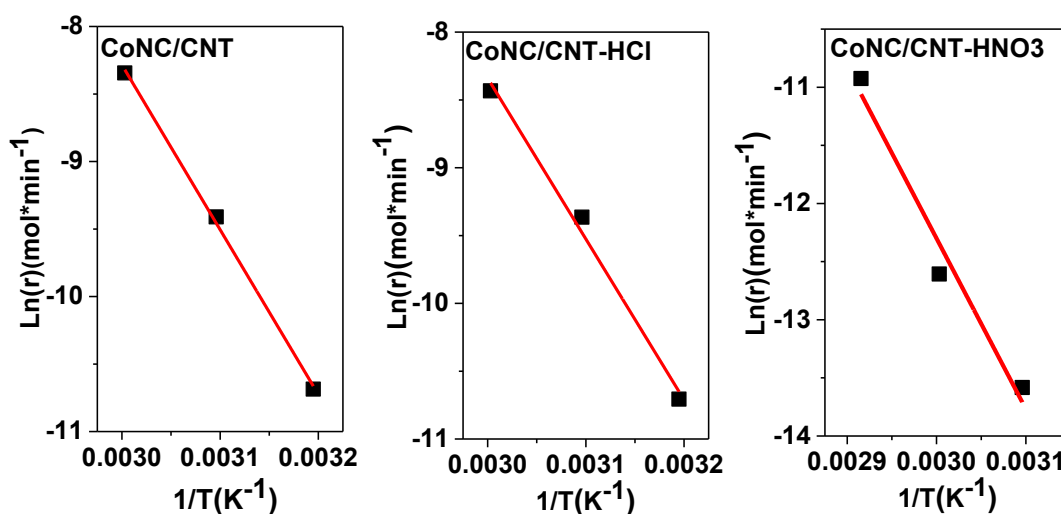

**Fig. S2** Arrhenius plots of the oxidative esterification over CoNC/CNT, CoNC/CNT-HCl and CoNC/CNT-HNO<sub>3</sub>. Different reaction conditions were used for different catalysts to ensure the conversion of BA lower than 10%.

Reaction conditions for CoNC/CNT and CoNC/CNT-HCl: 8 ml BA, 24 ml CH<sub>3</sub>OH, 0.1 g K<sub>2</sub>CO<sub>3</sub>, 0.05 g catalyst, 2 MPa O<sub>2</sub>.

Reaction conditions for CoNC/CNT-HNO<sub>3</sub>: 0.4 ml BA, 32 ml CH<sub>3</sub>OH, 0.1 g K<sub>2</sub>CO<sub>3</sub>, 0.2 g catalyst, 2 MPa O<sub>2</sub>.

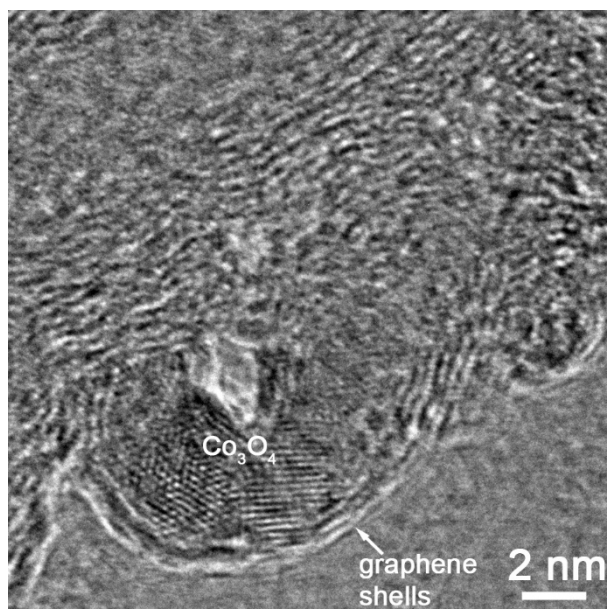

**Fig. S3** HRTEM image of a Co<sub>3</sub>O<sub>4</sub>@graphene core-shell structure on CoNC/CNT-HCl. This structure is only occasionally observed.

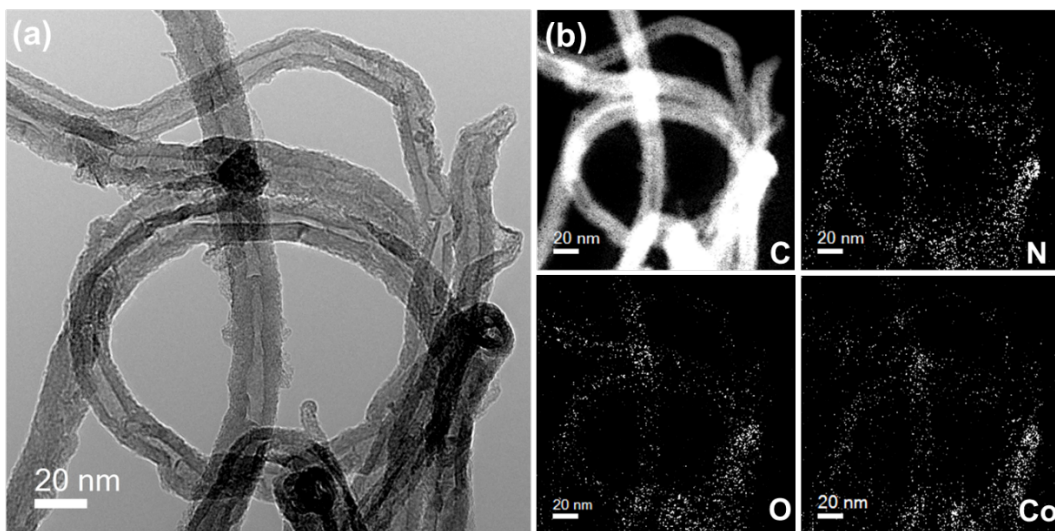

**Fig. S4** (a) TEM and (b) corresponding EFTEM images of CoNC/CNT-HCl.

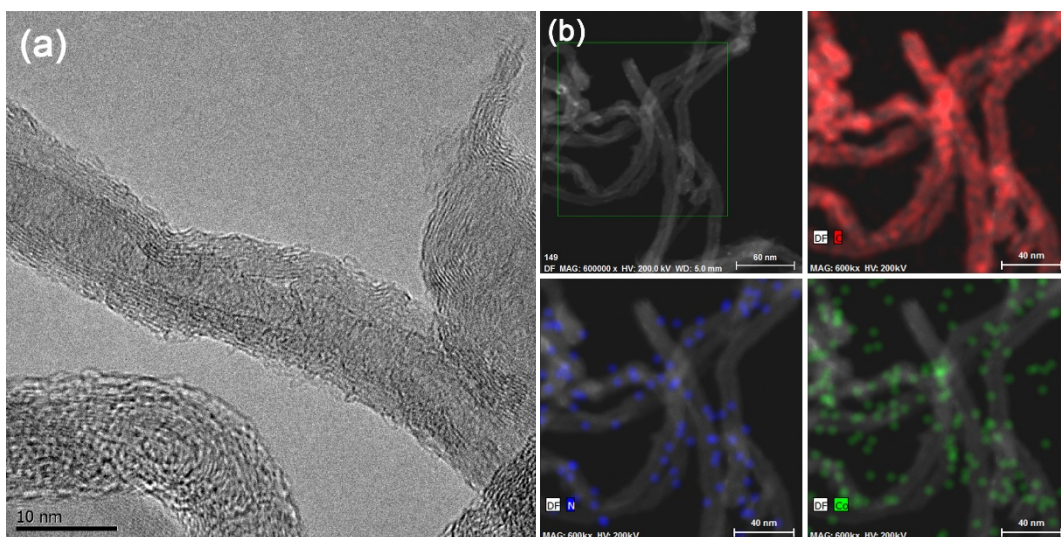

**Fig. S5** (a) HRTEM image and (b) STEM-EDS mapping images of CoNC/CNT-HCl

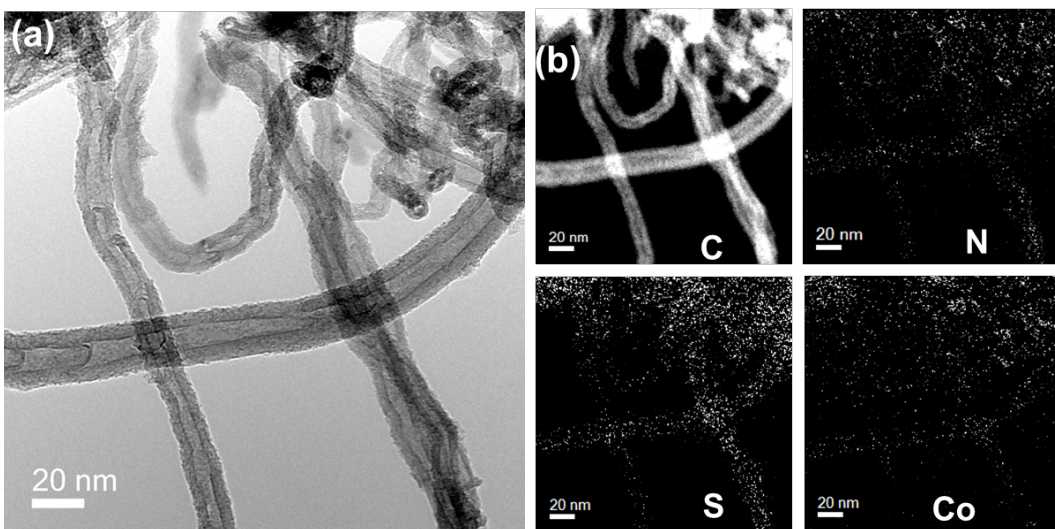

**Fig. S6** (a) TEM and (b) corresponding EFTEM images of CoNC/CNT-HCl after the adsorption of KSCN.

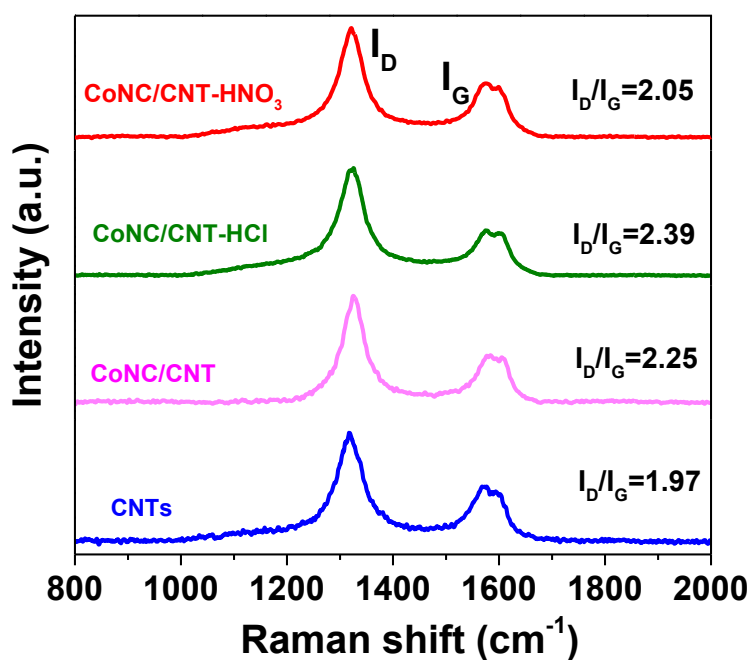

**Fig. S7** Raman spectra of CoNC/CNT, CoNC/CNT-HCl, CoNC/CNT-HNO<sub>3</sub> and CNTs. The I<sub>D</sub>/I<sub>G</sub> ratios of CoNC/CNT and CoNC/CNT-HCl are obviously higher than that of pristine CNTs, because of the formation of N-doped graphene during the pyrolysis. The I<sub>D</sub>/I<sub>G</sub> ratio of CoNC/CNT-HNO<sub>3</sub> is close to that of CNTs, indicating the destruction of the graphenes under oxidative HNO<sub>3</sub>.

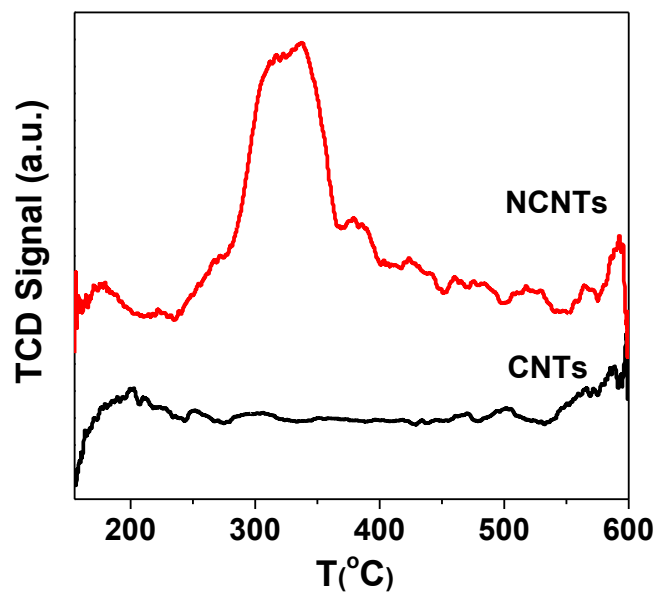

**Fig. S8** H<sub>2</sub>S-TPD profiles of CNTs and N-doped CNTs.

#### References

1. D. H. Pearson, C. C. Ahn and B. Fultz, *Physical Review B*, 1993, **47**, 8471-8478.
